# Supplementary material for: Manifold Based Optimization for Single-Cell 3D Genome Reconstruction
Source: PubMed Central journal article supplement (PMC4532452; doi:10.1371/journal.pcbi.1004396), 2015-08-11

**A**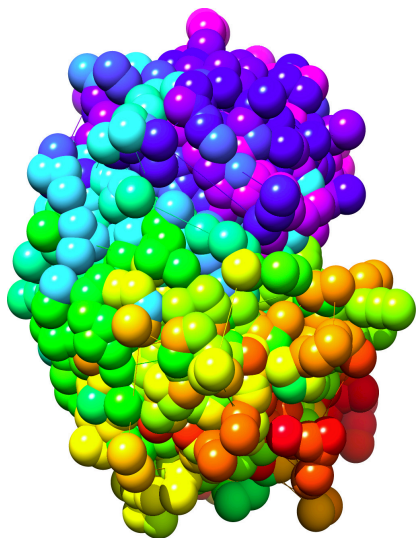

300 nm

**B**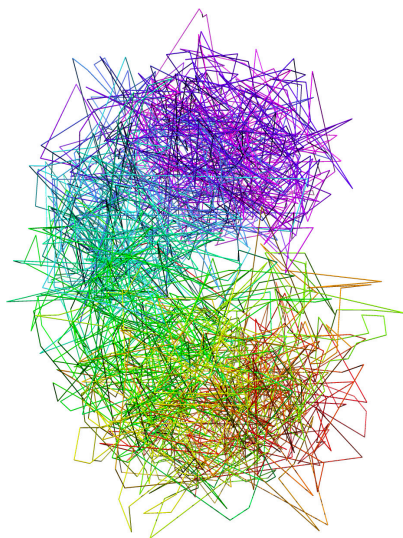

0 50 100 150 200  
Chromosome position (Mb)

**C**

Original contact map

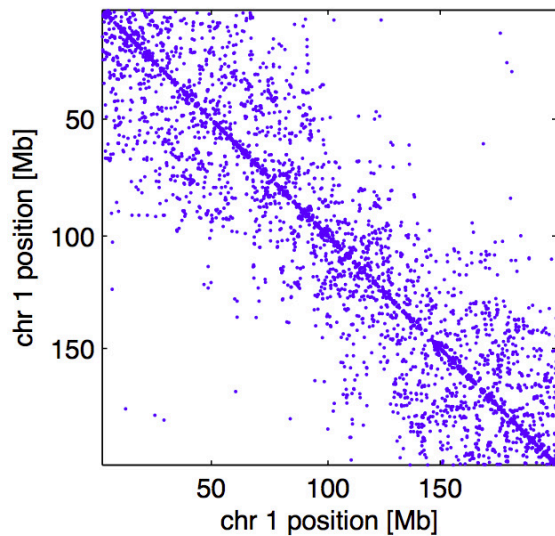**D**

Reconstructed contact map

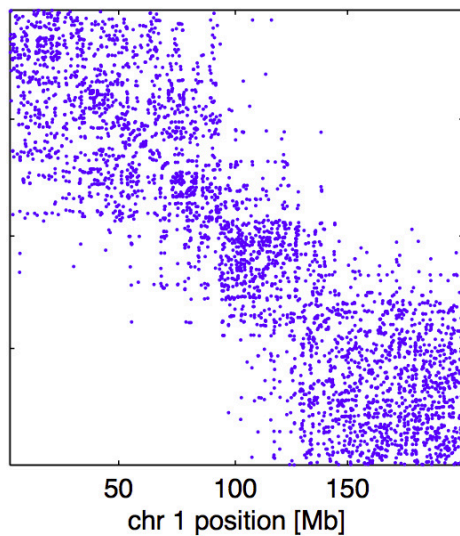

Supplement: pcbi.1004396.s003.pdf [file pcbi.1004396.s003.pdf]
