# Supplementary material for: Manifold Based Optimization for Single-Cell 3D Genome Reconstruction
Source: PubMed Central journal article supplement (PMC4532452; doi:10.1371/journal.pcbi.1004396), 2015-08-11

— CMDS — ChromSDE — MBO — MBO-squared

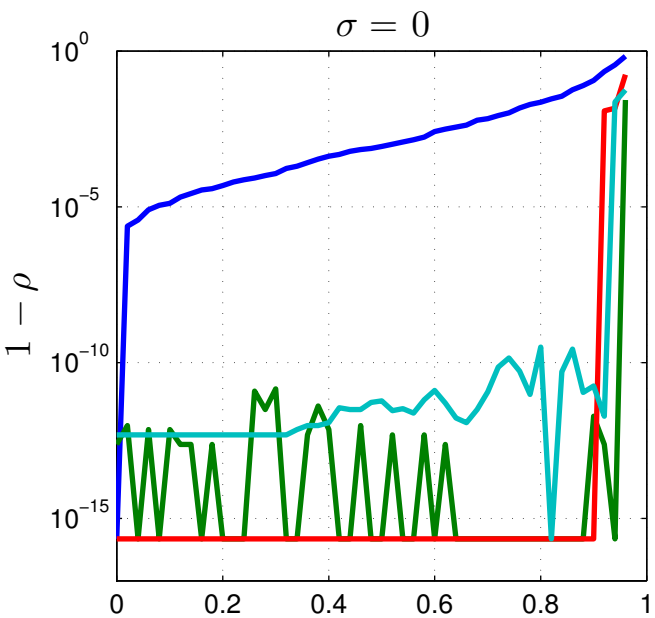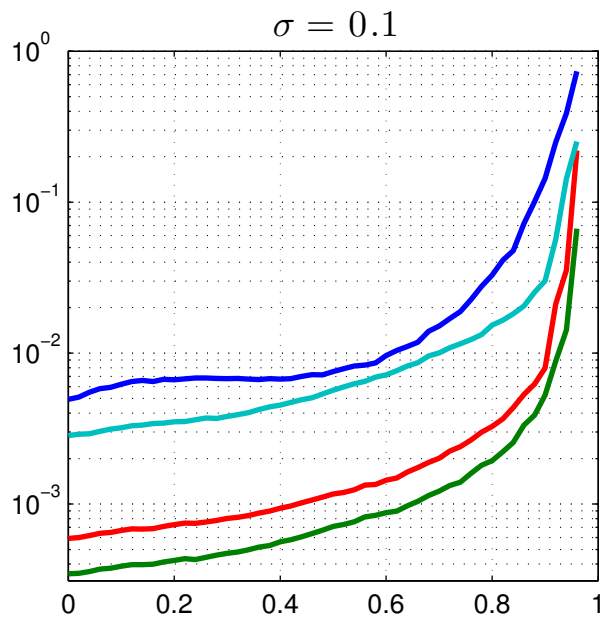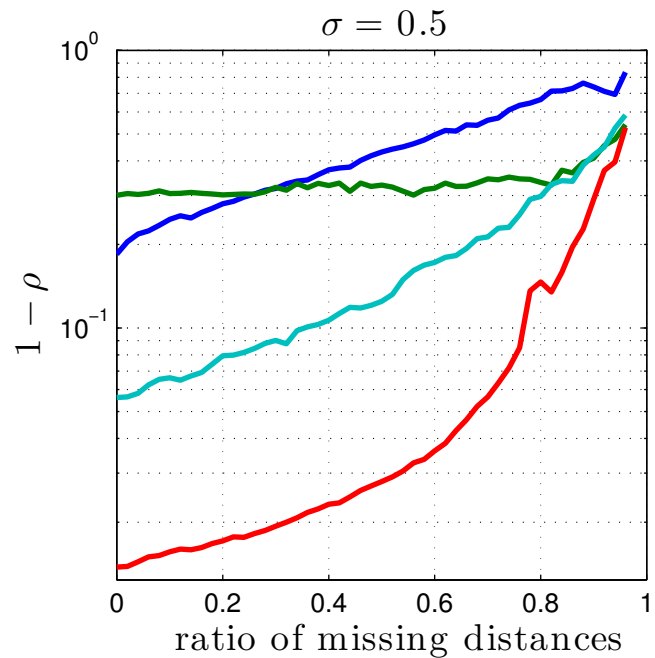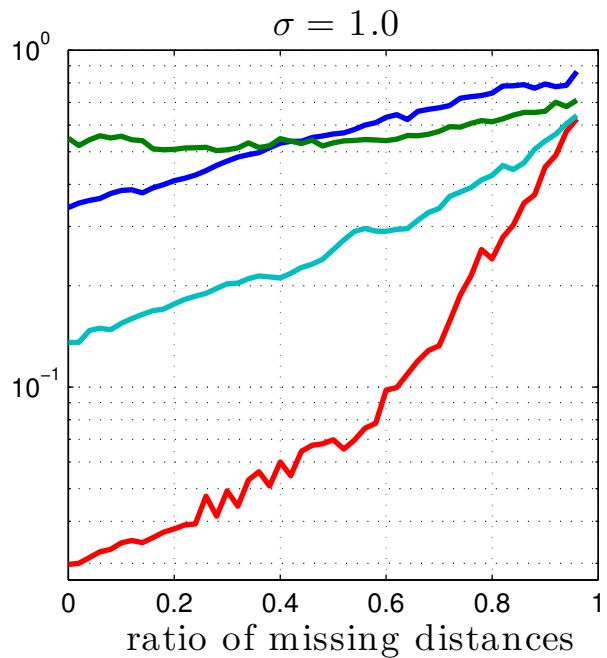

Supplement: pcbi.1004396.s007.pdf [file pcbi.1004396.s007.pdf]
